# Supplementary material
Source: Springer Nature journal article supplement (https://www.springermedizin.de/resource/supplementary/12959_2013_189_MOESM2_ESM.pdf/9569230)

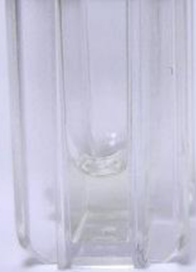

+

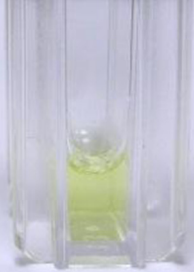

-

Supplement: MOESM2 [file 9569230]
